# Supplementary material
Source: MDPI journal article supplement (https://www.mdpi.com/2311-7524/8/1/30)
Supplement: s1 [file s1]

**Supplementary**

**Supplementary Table S1.** The fish feed composition.

| <b>Composition</b> |               |
|--------------------|---------------|
| Crude protein      | 32%           |
| Crude fat          | 6%            |
| Crude fibre        | 3.9%          |
| Ash                | 6%            |
| Calcium            | 1%            |
| Sodium             | 0.2%          |
| Phosphorus         | 0.8%          |
| <b>Additives</b>   |               |
| E672 Vitamin A     | 5000 U.I/I.E. |
| E671 Vitamin D3    | 750 U.I/I.E.  |
| E1 Iron            | 42 mg         |
| E2 Iodine          | 2.1 mg        |
| E4 Copper          | 5 mg          |
| E5 Manganese       | 16 mg         |
| E6 Zinc            | 100 mg        |
| E321 BHT           | 50 mg         |

**Supplementary Table S2.** Nutritional composition of the different solutions used for lettuce plants growth.

| Nutrient<br>(mg L <sup>-1</sup> ) | Control        | 50F/50D        |
|-----------------------------------|----------------|----------------|
| NO <sub>3</sub> <sup>-</sup>      | 573.08 ± 9.06  | 270.29 ± 14.74 |
| PO <sub>4</sub> <sup>3-</sup>     | 56.42 ± 11.05  | 57.82 ± 3.61   |
| SO <sub>4</sub> <sup>2-</sup>     | 274.66 ± 7.71  | 277.37 ± 5.59  |
| K <sup>+</sup>                    | 375.12 ± 19.20 | 289.54 ± 23.81 |
| Ca <sup>2+</sup>                  | 85.81 ± 7.49   | 80.34 ± 11.08  |
| Mg <sup>2+</sup>                  | 47.04 ± 3.07   | 51.74 ± 3.23   |
